# Supplementary material
Source: PubMed Central journal article supplement (PMC7747205)
Supplement: 40820_2017_179_MOESM1_ESM.pdf [file 40820_2017_179_MOESM1_ESM.pdf]

Supporting Information for

## **Porous Graphene Microflowers for High-Performance Microwave Absorption**

Chen Chen<sup>1</sup>, Jiabin Xi<sup>1</sup>, Erzhen Zhou<sup>2</sup>, Li Peng<sup>1</sup>, Zichen Chen<sup>2</sup>, \*, Chao Gao<sup>1</sup>, \*

<sup>1</sup>MOE Key Laboratory of Macromolecular Synthesis and Functionalization, Department of Polymer Science and Engineering, Key Laboratory of Adsorption and Separation Materials & Technologies of Zhejiang Province, Zhejiang University, 38 Zheda Road, Hangzhou 310027, People's Republic of China

<sup>2</sup>Department of Mechanical Engineering, Zhejiang University, 38 Zheda Road, Hangzhou 310027, People's Republic of China

\*Corresponding authors. E-mail: chaogao@zju.edu.cn, chenzc@zju.edu.cn  
Tel: +86-(0)571-87952088

### **Figures and Table**

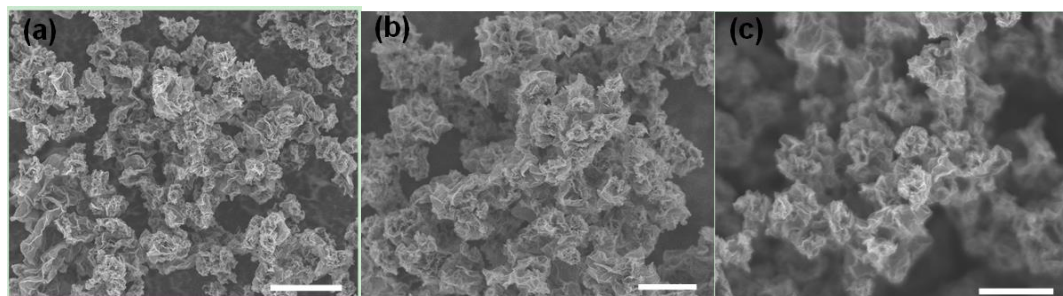

**Fig. S1** **a** SEM image of fGO. **b** SEM image of fGO after chemical reduction. **c** SEM image of fGO after chemical reduction and thermal treatment. Scale bars: 10 μm in **a**, 5 μm in **b**, **c**

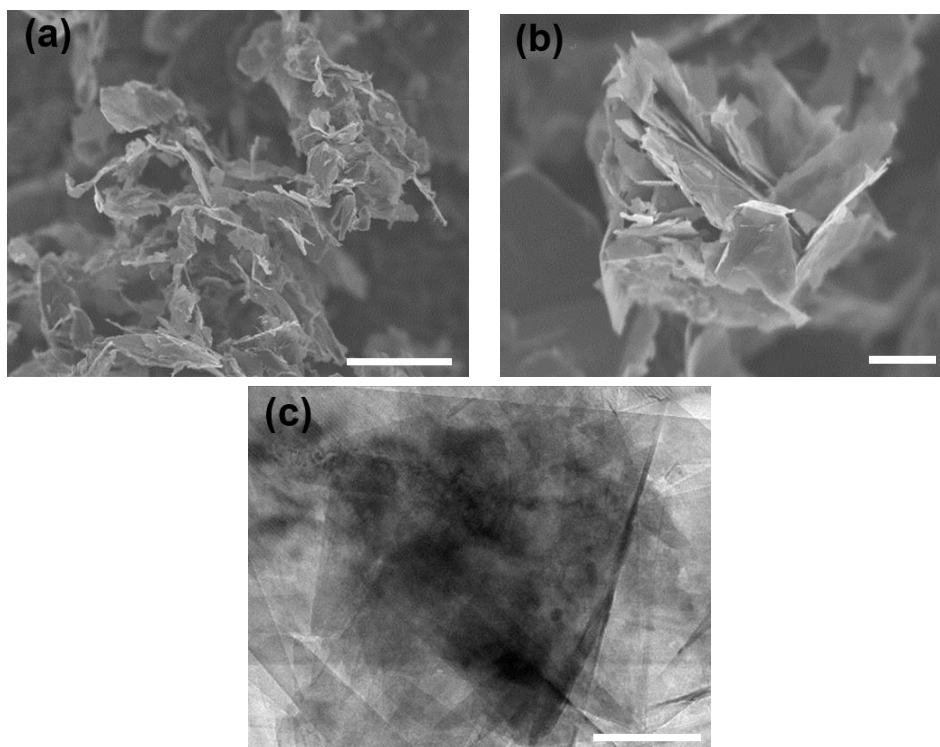

**Fig. S2** **a, b** SEM images of CG. **c** TEM image of CG.  
Scale bars: 10 μm in **a**, 2 μm in **b** and 500 nm in **c**

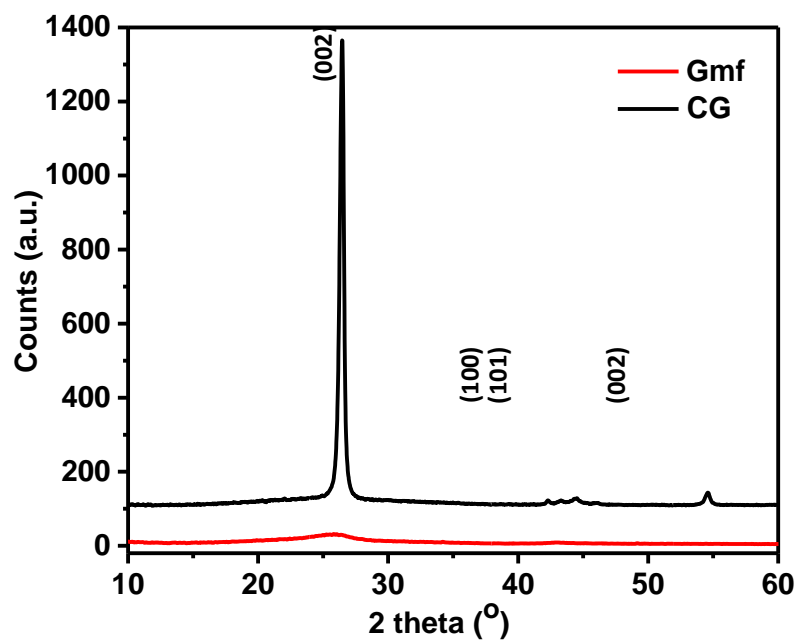

**Fig. S3** XRD patterns of Gmf and CG

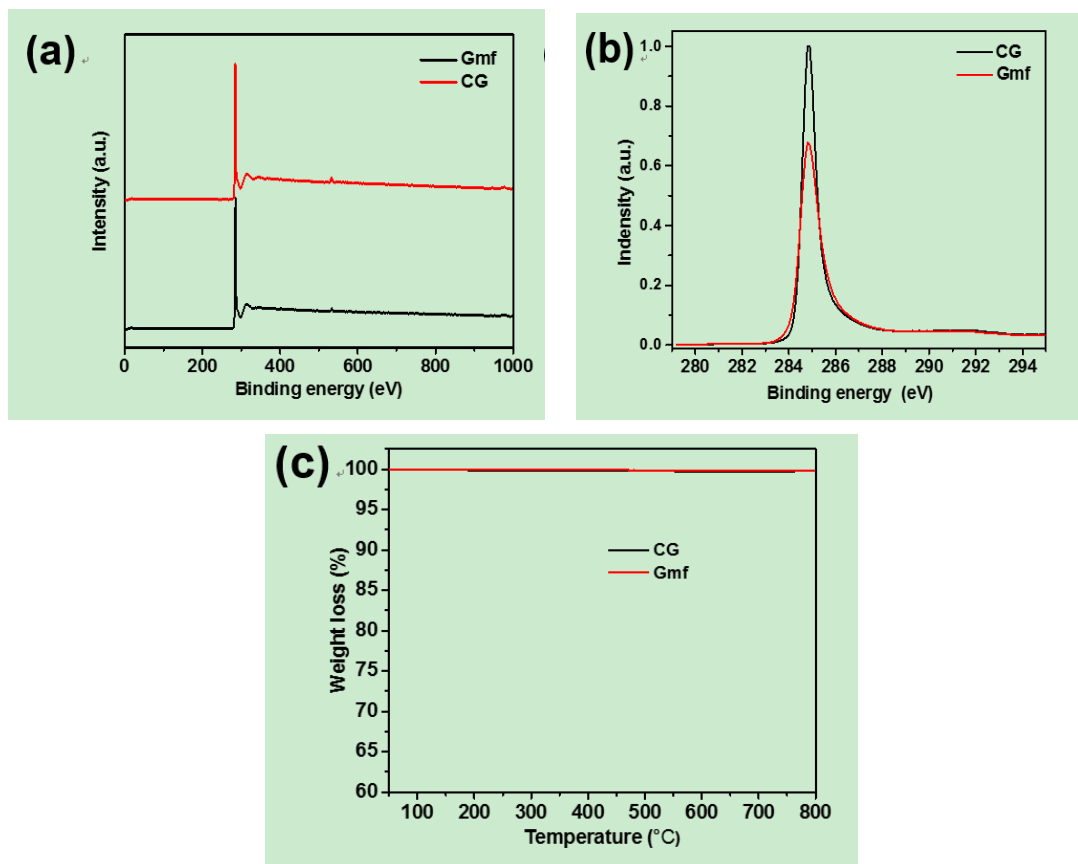

**Fig. S4** **a** XPS patterns of Gmf and CG. **b** C 1s spectra of CG and Gmf from XPS analysis. **c** TGA curves of Gmf and CG

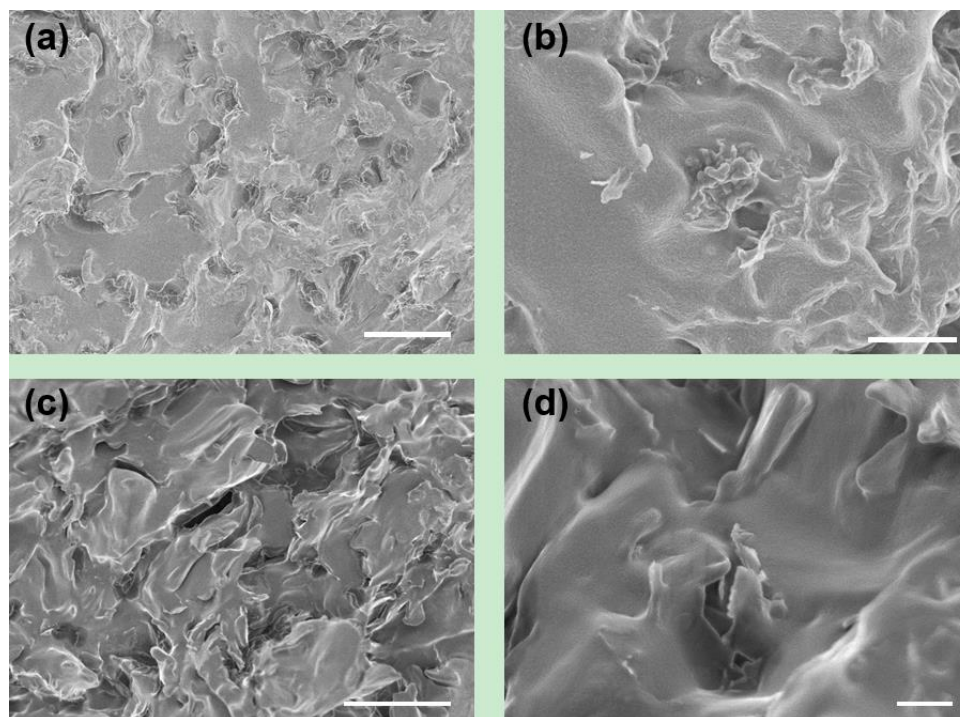

**Fig. S5** Cross-section SEM images of Gmf/paraffin **a, b** and CG/paraffin **c, d**. Scale bars: 15 μm in **a, c** and 2 μm in **b, d**

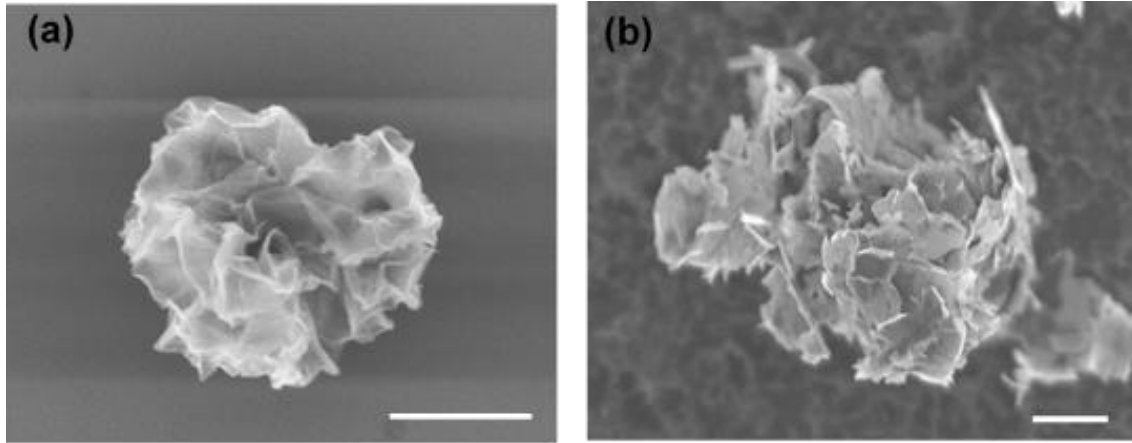

**Fig. S6** SEM images of **a** Gmf/paraffin and **b** CG/paraffin composites after paraffin was dissolved by petroleum ether. Scale bars: 1  $\mu\text{m}$  in **a** and 5  $\mu\text{m}$  in **b**

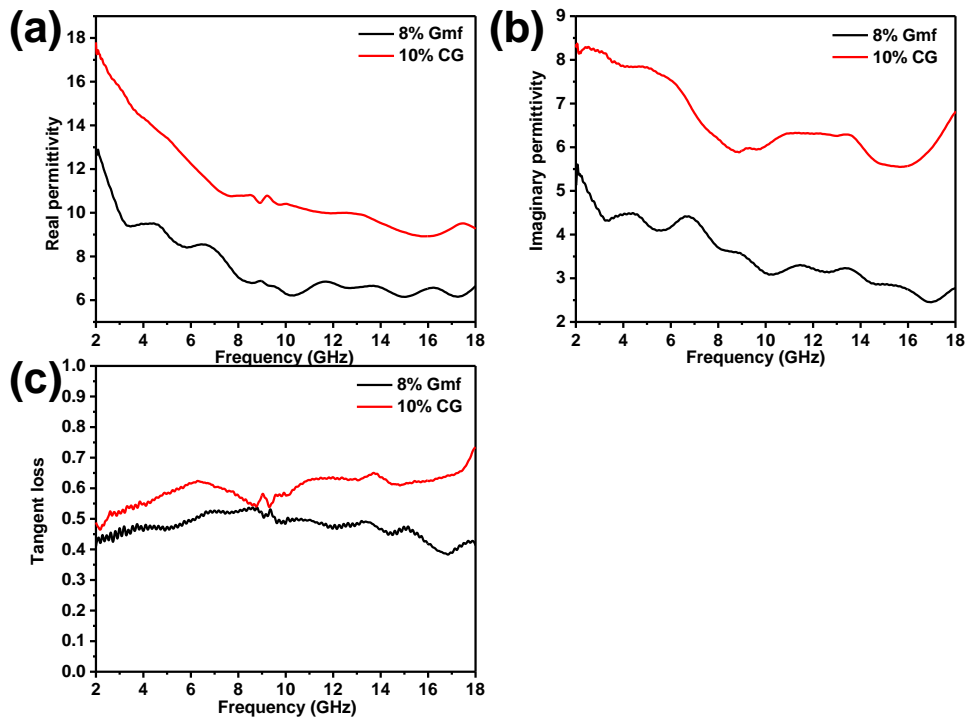

**Fig S7 a** The real permittivity, **b** imaginary permittivity and **c** tangent loss of 8 wt% Gmf/paraffin and 10 wt% CG/paraffin

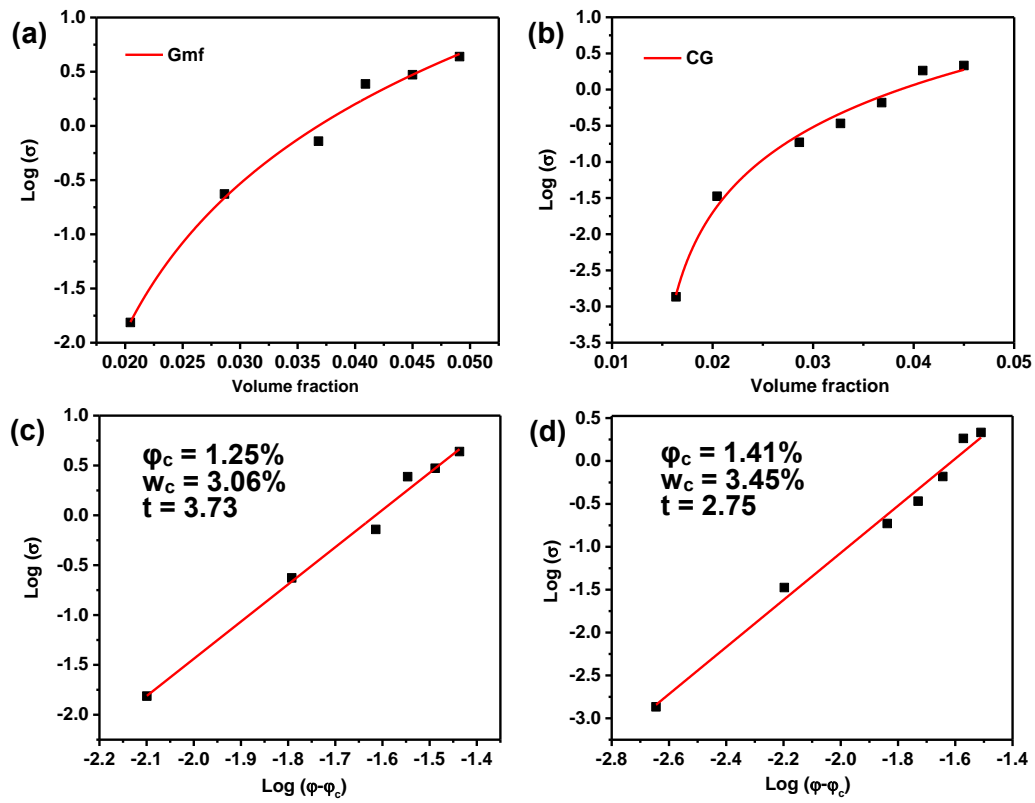

**Fig. S8** Log dc conductivity ( $\delta$ ) vs volume fraction ( $\phi$ ) of Gmf/paraffin composites **a** and CG/paraffin composites **b**. Log-log plots of  $\delta$  vs  $(\phi - \phi_c)$  for Gmf/paraffin composites **c** and CG/paraffin composites **d**. The percolation volume fraction ( $\phi_c$ ), percolation weight fraction ( $w_c$ ) and critical exponent ( $t$ ) are shown in the graphs

**Table S1** Comparison of the MA performances of Gmf, CG and the reported graphene-based materials

| Composition                         | Thickness (mm) | wt%  | Max  RL  (dB) | Frequency range (GHz) | EAB [RL $\leq$ -10] (GHz) | Ref.      |
|-------------------------------------|----------------|------|---------------|-----------------------|---------------------------|-----------|
| Gmf/Paraffin                        | 2              | 10   | 42.93         | 2~18                  | 5.59 (12.41~18)           | This work |
| CG/Paraffin                         | 2              | 10   | 29.2          | 2~18                  | 4.24 (13.14~17.38)        | This work |
| PPy/GO/Paraffin                     | 3              | 30   | 38.9          | 2~18                  | 6.2 (9.2~15.4)            | 1         |
| GN/Carbon/Paraffin                  | 1.5            | 10   | 28.1          | 2~18                  | 5.7                       | 2         |
| MoS <sub>2</sub> -Graphene/Paraffin | 2              | 10   | 33            | 2~18                  | 5.7 (11.7~17.4)           | 3         |
| CR-G/PEO                            | 2              | 5    | 32.4          | 2~18                  | 5.6 (12.4~18)             | 4         |
| Graphene/PANI/wax                   | 3.5            | 10   | 36.9          | 2~18                  | 5.3(8.2~13.5)             | 5         |
| B,N-graphene/Paraffin               | 16             | 25   | 33.6          | 2~18                  | 4.6                       | 6         |
| RGO/NBR                             | 3              | 10   | 57            | 4~12                  | 4.5 (7.5~12)              | 7         |
| RGO/PANI/Paraffin                   | 2              | 50   | 41.4          | 2~18                  | 4.2(11.7~15.9)            | 8         |
| Graphene/Silica textile/PF          | 3.5            | 76.8 | 36            | 8.2~12.4              | 4.2 (8.2~12.4)            | 9         |
| RGO/Cu <sub>2</sub> O/Cu/Paraffin   | 1.3            | 50   | 51.8          | 2~18                  | 4.1 (12.1~16.2)           | 10        |
| Graphene/CNT/Paraffin               | 3              | 5    | 44.6          | 2~18                  | 3.3 (7.1~10.4)            | 11        |
| PEDOT/Graphene/Paraffin             | 2              | 25   | 48.1          | 2~18                  | 3.1 (9.2~12.3)            | 12        |
| N-graphene/PANI/Paraffin            | 3              | 25   | 38.8          | 2~18                  | 2.3(6.8~8.8)              | 13        |

## Reference

- [1] X. Chen, J. Chen, F. Meng, L. Shan, M. Jiang, X. Xu, J. Lu, Y. Wang, Z. Zhou, Hierarchical composites of polypyrrole/graphene oxide synthesized by in situ intercalation polymerization for high efficiency and broadband responses of electromagnetic absorption. *Compos. Sci. Technol.* **127**, 71-78 (2016). <https://doi.org/10.1016/j.compscitech.2016.02.033>
- [2] H. Lv, Y. Guo, Y. Zhao, H. Zhang, B. Zhang, G. Ji, Z.J. Xu, Achieving tunable electromagnetic absorber via graphene/carbon sphere composites. *Carbon* **110**, 130-137 (2016). <https://doi.org/10.1016/j.carbon.2016.09.009>
- [3] Y. Wang, D. Chen, X. Yin, P. Xu, F. Wu, M. He, Hybrid of MoS<sub>2</sub> and reduced graphene oxide: A lightweight and broadband electromagnetic wave absorber. *ACS Appl. Mater. Interfaces* **7**(47), 26226-26234 (2015). <https://doi.org/10.1021/acsami.5b08410>
- [4] X. Bai, Y. Zhai, Y. Zhang, Green approach to prepare graphene-based composites with high microwave absorption capacity. *J. Phys. Chem. C* **115**(23), 11673-11677 (2011). <https://doi.org/10.1021/jp202475m>
- [5] X. Chen, F. Meng, Z. Zhou, X. Tian, L. Shan, et al., One-step synthesis of graphene/polyaniline hybrids by in situ intercalation polymerization and their

- electromagnetic properties. *Nanoscale* **6**(14), 8140-8148 (2014).  
<https://doi.org/10.1039/C4NR01738B>
- [6] Y. Kang, Z. Chu, D. Zhang, G. Li, Z. Jiang, H. Cheng, X. Li, Incorporate boron and nitrogen into graphene to make BCN hybrid nanosheets with enhanced microwave absorbing properties. *Carbon* **61**(11), 200-208 (2013).  
<https://doi.org/10.1016/j.carbon.2013.04.085>
- [7] V.K. Singh, A. Shukla, M.K. Patra, L. Saini, R.K. Jani, S.R. Vadera, N. Kumar, Microwave absorbing properties of a thermally reduced graphene oxide/nitrile butadiene rubber composite. *Carbon* **50**(6), 2202-2208 (2012).  
<https://doi.org/10.1016/j.carbon.2012.01.033>
- [8] P. Liu, Y. Huang, Decoration of reduced graphene oxide with polyaniline film and their enhanced microwave absorption properties. *J. Polym. Res.* **21**(5), 1-5 (2014).  
<https://doi.org/10.1007/s10965-014-0430-7>
- [9] W.L. Song, X.T. Guan, L.Z. Fan, Y.B. Zhao, W.Q. Cao, C.Y. Wang, M.S. Cao, Strong and thermostable polymeric graphene/silica textile for lightweight practical microwave absorption composites. *Carbon* **100**, 109-117 (2016).  
<https://doi.org/10.1016/j.carbon.2016.01.002>
- [10] M. Zong, Y. Huang, H. Wu, Y. Zhao, P. Liu, L. Wang, Facile preparation of RGO/Cu<sub>2</sub>O/Cu composite and its excellent microwave absorption properties. *Mater. Lett.* **109**(1), 112-115 (2013). <https://doi.org/10.1016/j.matlet.2013.07.045>
- [11] L. Wang, Y. Huang, C. Li, J. Chen, X. Sun, A facile one-pot method to synthesize a three-dimensional graphene@carbon nanotube composite as a high-efficiency microwave absorber. *Phys. Chem. Chem. Phys.* **17**(3), 2228-2234 (2014). <https://doi.org/10.1039/C4CP04745A>
- [12] X. Zhang, Y. Huang, P. Liu, Enhanced electromagnetic wave absorption properties of poly(3,4-ethylenedioxythiophene) nanofiber-decorated graphene sheets by non-covalent interactions. *Nano-Micro Lett.* **8**(2), 131-136 (2016).  
<https://doi.org/10.1007/s40820-015-0067-z>
- [13] L. Wang, Y. Huang, H. Huang, N-doped graphene@polyaniline nanorod arrays hierarchical structures: Synthesis and enhanced electromagnetic absorption properties. *Mater. Lett.* **124**(6), 89-92 (2014).  
<https://doi.org/10.1016/j.matlet.2014.03.066>
